# Supplementary material
Source: publisher figshare collection journal article supplement (https://future-science-group.figshare.com/ndownloader/files/28532784)

## Distribution of Propensity Scores

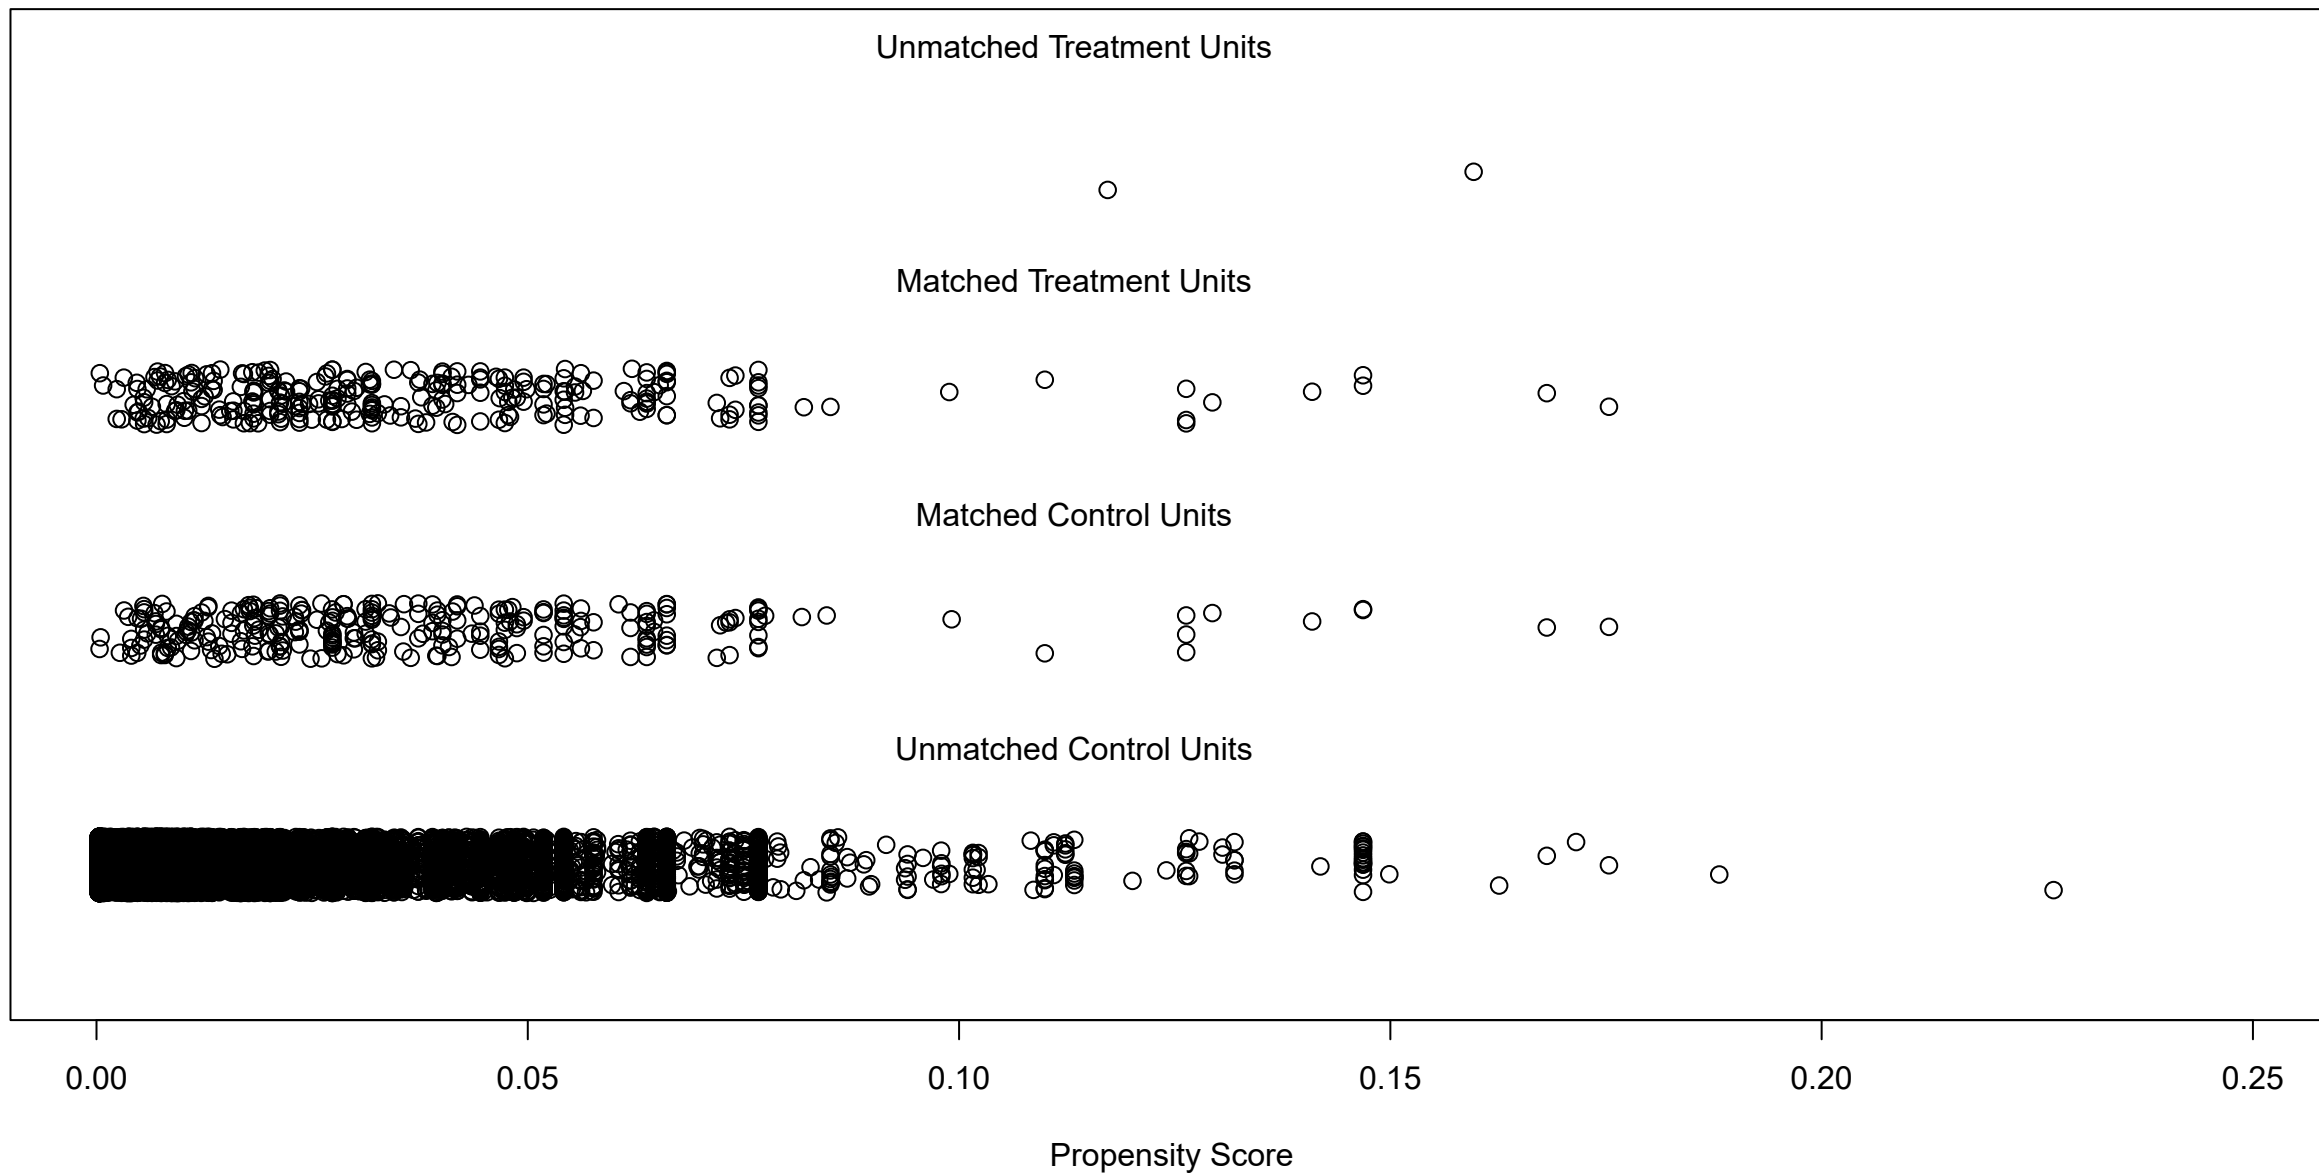

Supplement: Supplementary file 1 [file 28532784]
